# Supplementary material
Source: PubMed Central journal article supplement (PMC5289865)
Supplement: 993FigureS1.pdf [file 993FigureS1.pdf]

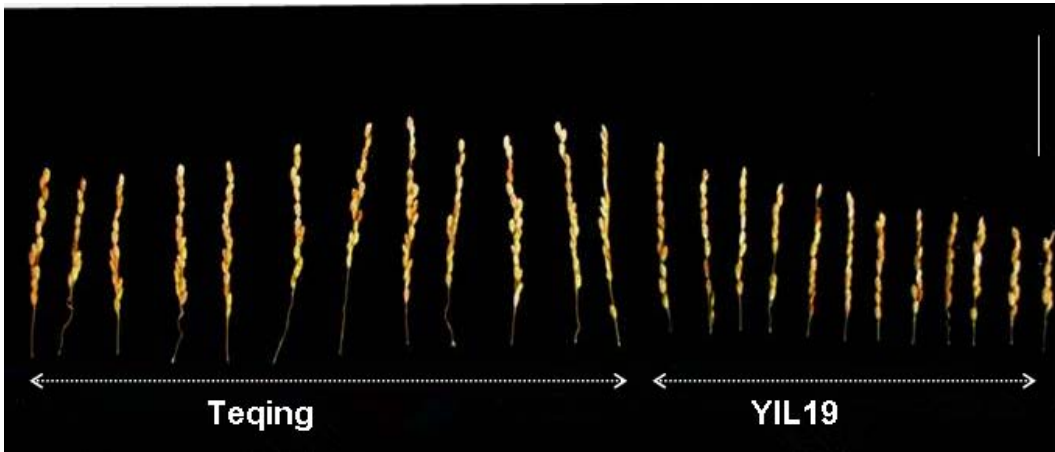

**Figure S1.** A comparison of the primary branches in a main panicle of 'YIL19' to one of 'Teqing'. White Bar=5cm.
