# Supplementary material
Source: PubMed Central journal article supplement (PMC5289865)
Supplement: 993FigureS3.pdf [file 993FigureS3.pdf]

a

YIL19

LOC\_Os02g56630

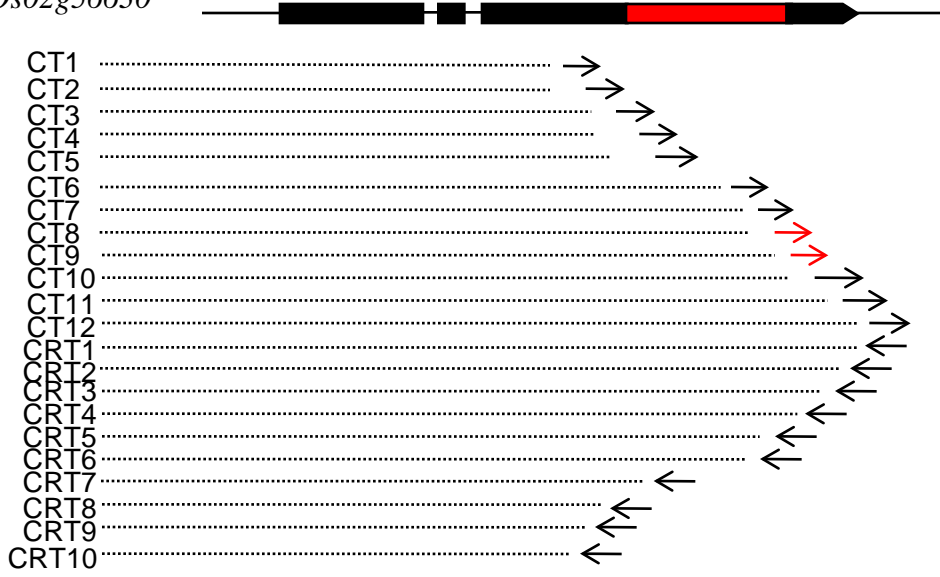

b

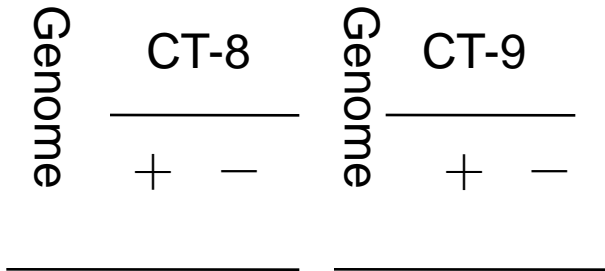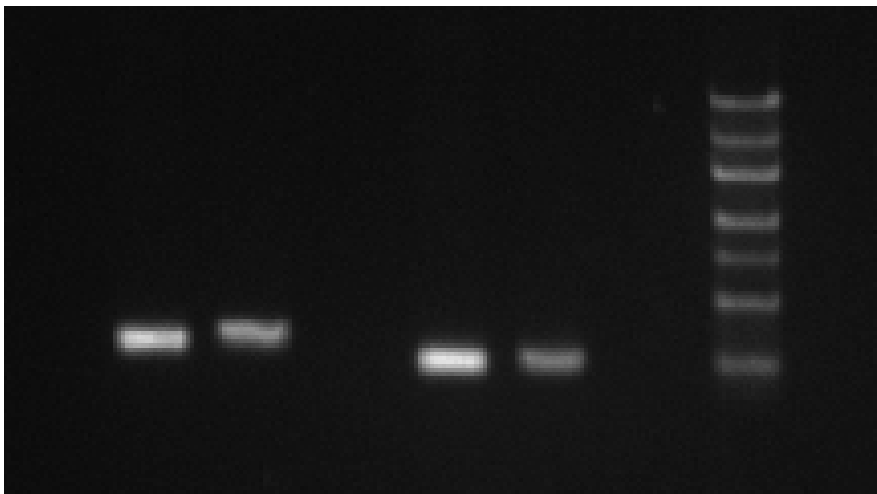

**Figure S3.** Detection of the unpredicted transcripts. (a) Names and positions of the primers used for primer walking. The lines indicate the position of the primers, the arrows represent the direction of the possible product. The lines in red represent the transcriptional unit detected in primer walking. (b) Strand-specific RT-PCR for determining the transcripts. The genome lane was obtained by reverse-transcription without Dnase I pre-treatment. The inclusion or exclusion of reverse-transcriptase is indicated by “+” and “-”, respectively. Marker indicates a Marker III ladder
