# Supplementary material
Source: PubMed Central journal article supplement (PMC5289865)
Supplement: 993FigureS4.pdf [file 993FigureS4.pdf]

**Figure S4.** The full length sequence of transcripts *GN2.1* and *GN2.2*

*GN2.1*

CCCCCTTGCCCTGCCTGTGCCAGCGGCTGCCTTAGTAGCCTATGACGAG  
TAGGACTACCCAACAAAAATTCCTGGCTACGCCACTGCATAAGCATGAAT  
GGAGAAGAACGGCCAACGATGAAAGAGGTTGCTGAGAGGCTGGAGATG  
TTAAGGAGATACCAGCAGCACCCATGGGTTGAAGCTGAAGACAATGCAG  
AGGAGATTGAGAGCTTGCTCGGCAGGGAACAACAGAATGCAAATTACCA  
ACTCGAGCAACAAAATGTCTTGTATTTGGAAGAAGGCCGTAAC TATACATT  
TAGCATGTAGATCACGCTGTTTTGAATTATGTTTTGTAAATCAATCAACACA  
GATATGACTTCTTTTTCTATGTAACATGAAAAGCAAATTTATGGCCATTGC  
AGAAAGGACAAAGAGTTTGGAAATGAAATCTTAACATGTAAATCTTTATTG  
GACAATTAATATAGCTCCCATGCATAATAAATTGCAATGAAAGAA

*GN2.2*

CCCCCTTGCCCTGCCTGTGCCAGCGGCTGCCTTAGTAGCCTATGACGAG  
GACTACCCAACAAAAATTCCTGGCTACGCCACTGCATAAGCATGAATGG  
AGAAGAACGGCCAACGATGAAAGAGGTTGCTGAGAGGCTGGAGATGTTA  
AGGAGATACCAGCAGCACCCATGGGTTGAAGCTGAAGACAATGCAGAGG  
AGATTGAGAGCTTGCTCGGCAGGGAACAACAGAATGCAAATTACCAACTC  
GAGCAACAAAATGTCTTGTATTTGGAAGAAGGCCGTAAC TATACATTTAGC  
ATGTAGATCACGCTGTTTTGAATTATGTTTTGTAAATCAATCAACACAGATA  
TGACTTCTTTTTCTATGTAACATGAAAAGCAAATTTATGGCCATTGCAGAA  
AGGACAAAGAGTTTGGAAATGAAATCTTAACATGTAAATCTTTATTGGACA  
ATTAATATAGCTCCCATGCATAATAAATTGCAATGAAAGAA
