# Supplementary material
Source: PubMed Central journal article supplement (PMC5289865)
Supplement: 993FigureS5.pdf [file 993FigureS5.pdf]

tcatgcttcactacagcaatgaaagttggtcgccatcaagaacctctagatagccaaagtaagggaatgagatgagc.gctgaaa  
tgctagaagagatcacatacctcctgatgc.gatgcataagcacattggcgtagctagggggtagtcctggtgggctcggg  
actacccccgaattggcccaggagc.cccaccccccaaaaatttagcccagacttaagcccaagaagccagcccaat  
aagaaatgaaaaattagaaaggctagggtttgaggttcgctgcaacccgacgctacttcgttcgcacgcgtgtgacgacc  
gcccattgccgccgcggtcctccttcccggcctcggcagctcgccttgcctcgcattggtccgcagctcccacctctccc  
ctgtcgttcttgtccgccgaggcactgagccgctgccgtcgttgacctcccggctgctcaatccaggagaggcggactga  
cggaggttagtggcgcctcacgccgctgaaccgccaaagcgcgctggtcgccggcggcgggagcccaagggcccctg  
gccggttggccctagttgattgccgctcctCCCCCTTGCCCTGCCTGTGCCAGCGCTGCCTT  
AGTAGCCTATGACGA Ggtgagtttaagtgc taactggtgaattgaagctatgagcctatgaaatcaaatagatg  
tatatttctaactgtgatttgcacatgtagttaagtgaatgactgaatgtgtgacgttgacttgctatggaatgtgaattagta  
attagagctatgaactgtgatttgcatagtgctaattggtgaattagaactatgaaactgtgatttgaatcactgaatgtgctgt  
tgacttgctgccatttatttagttttagaggattccttggcaaaattaagtagtagtttgataaggttggttcgagaaattggaaca  
aatccgacgcacttgacaacaatgtaggggttgaacaagtaaacacaataaaaaagcttcagagaaattattatgaaagatg  
caccaattgctatatttctaattttagtggcctttctc taaattt gatctgtatatgggatttacggtgattgaaaaatttagtatg  
tgatgtgaacttgaatccagaagTAGGACTACCCACAAAAATTTCTCTGGCTACGCCAC  
TGCATAAGCATGAATGGAGAAGAACGGCCAACGATGAAAGAGGTTGCTG  
AGAGGCTGGAGATGTTAAGGAGATACCAGCAGCACCCATGGGTTGAAGCT  
GAAGACAATGCAGAGGAGATTGAGAGCTTGCTCGGCAGGGAACAACAGA  
ATGCAAATTACCAACTCGAGCAACAAAATGTCTTGTATTTGGAAGAAAGGCC  
GTA ACTATA CATT TAGCATGTAGATCACGCTGTTTTGAATTATGTTTTGTAAA  
TCAATCAACACAGATATGACTTCTTTTTCTATGTAACATGAAAAAGCAAATT  
TATGGCCATTGCAGAAAGGACAAAGAGTTTGGAAATGAAATCTTAACATGT  
AAATCTTTATTGGACAATTAATATAGCTCCCATGCATAATAAATTGCAATGA  
AAGAACCA

**Figure S5.** The sequence at the locus of *GN2* in ‘YIL19’. The black vertical arrow indicates the transcriptional start site for *GN2*. The two exon sequences of *GN2* are in capital letters. The adenylation signals (AATAAA) are in bold and double underlined. Alternative splicing sites are indicated by white vertical arrows. The inserted sequence is flanked by the short direct repeats of TGCATAAGCA, which are underlined.
