# Supplementary material
Source: PubMed Central journal article supplement (PMC5289865)
Supplement: 993FigureS7.pdf [file 993FigureS7.pdf]

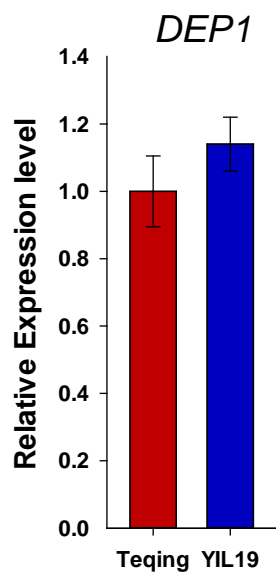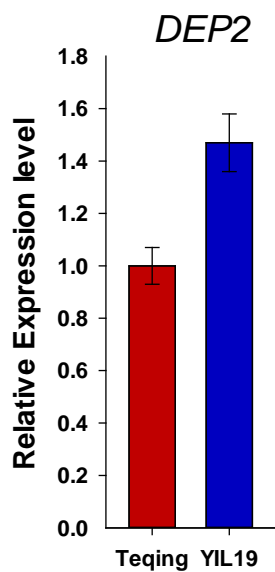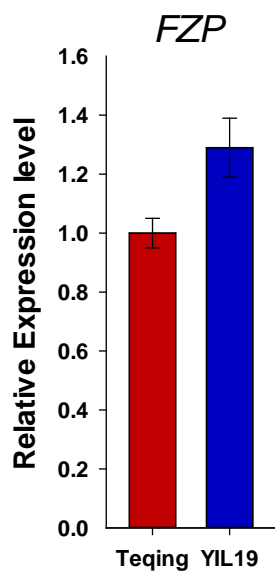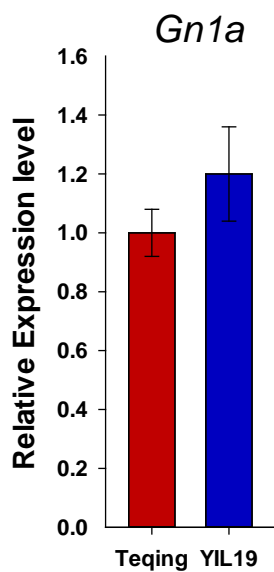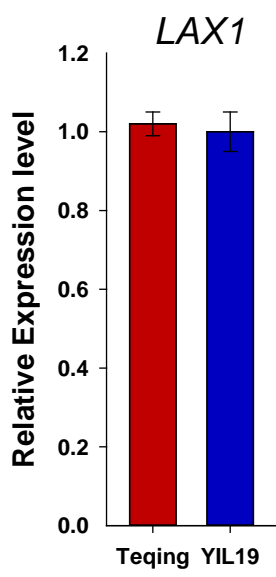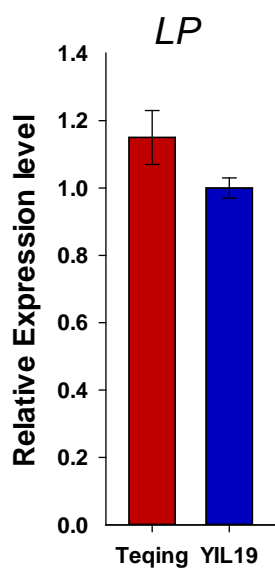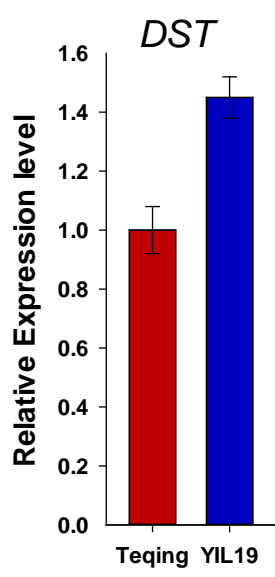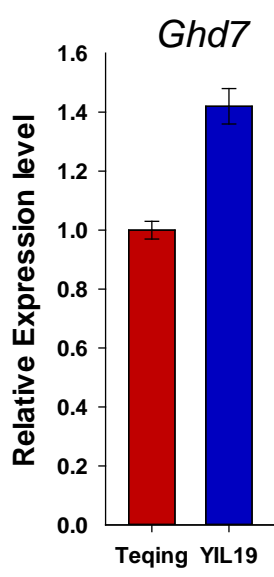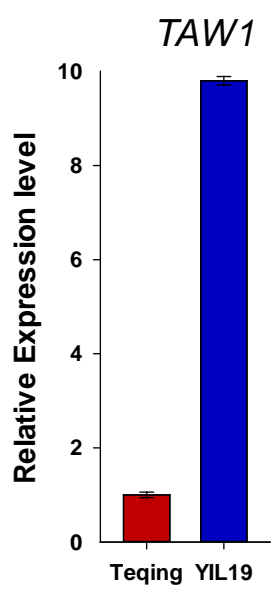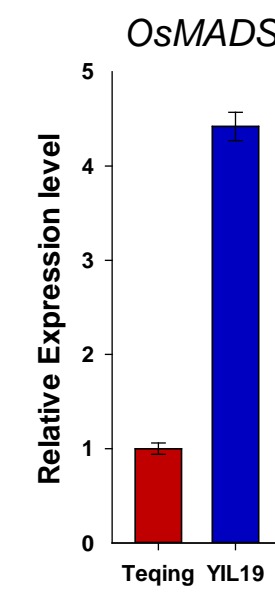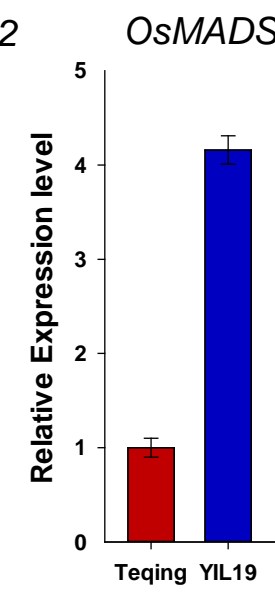

**Figure S7.** The expression pattern of known genes associated with rice grain number in the young panicle of ‘YIL19’ and ‘Teqing’. Values are means  $\pm$  SD of three independent experiments. The expression levels have been normalized to those of rice *ubiquitin*.
