# Supplementary material
Source: PubMed Central journal article supplement (PMC5289865)
Supplement: 993FigureS8.pdf [file 993FigureS8.pdf]

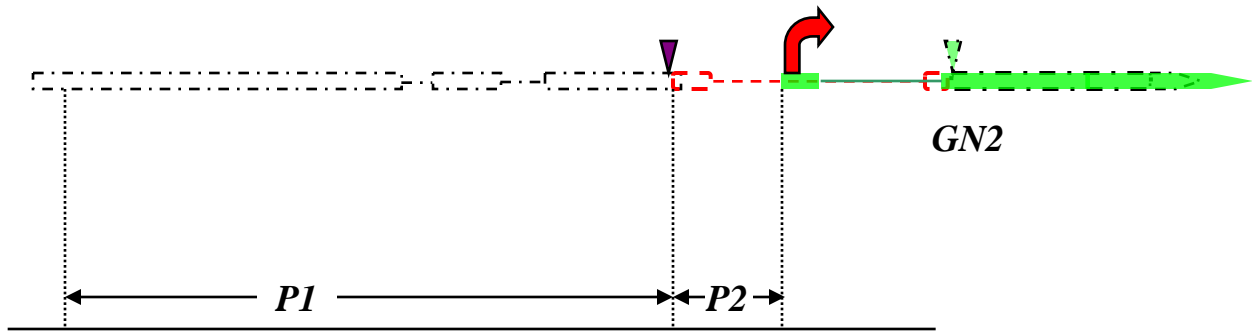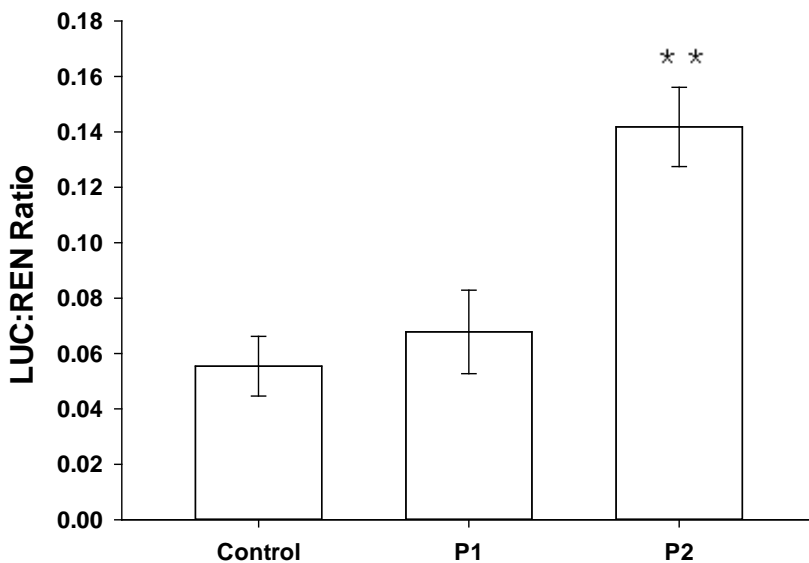

**Figure S8.** Protoplast Transfection Assays of transcriptional ability for the upstream sequence of *GN2*.

P1 contains the ancestral sequence of *LOC\_Os02g56630* including ~2-kb genomic sequence upstream of *GN2*, and P2 contains the inserted sequence upstream of *GN2* from *LOC\_Os02g45150*. Control represents an empty plasmid control. The red right angle arrow represents the transcriptional start site. All of the data was analyzed three times.
