# Supplementary material
Source: PubMed Central journal article supplement (PMC5289865)
Supplement: 993FigureS9.pdf [file 993FigureS9.pdf]

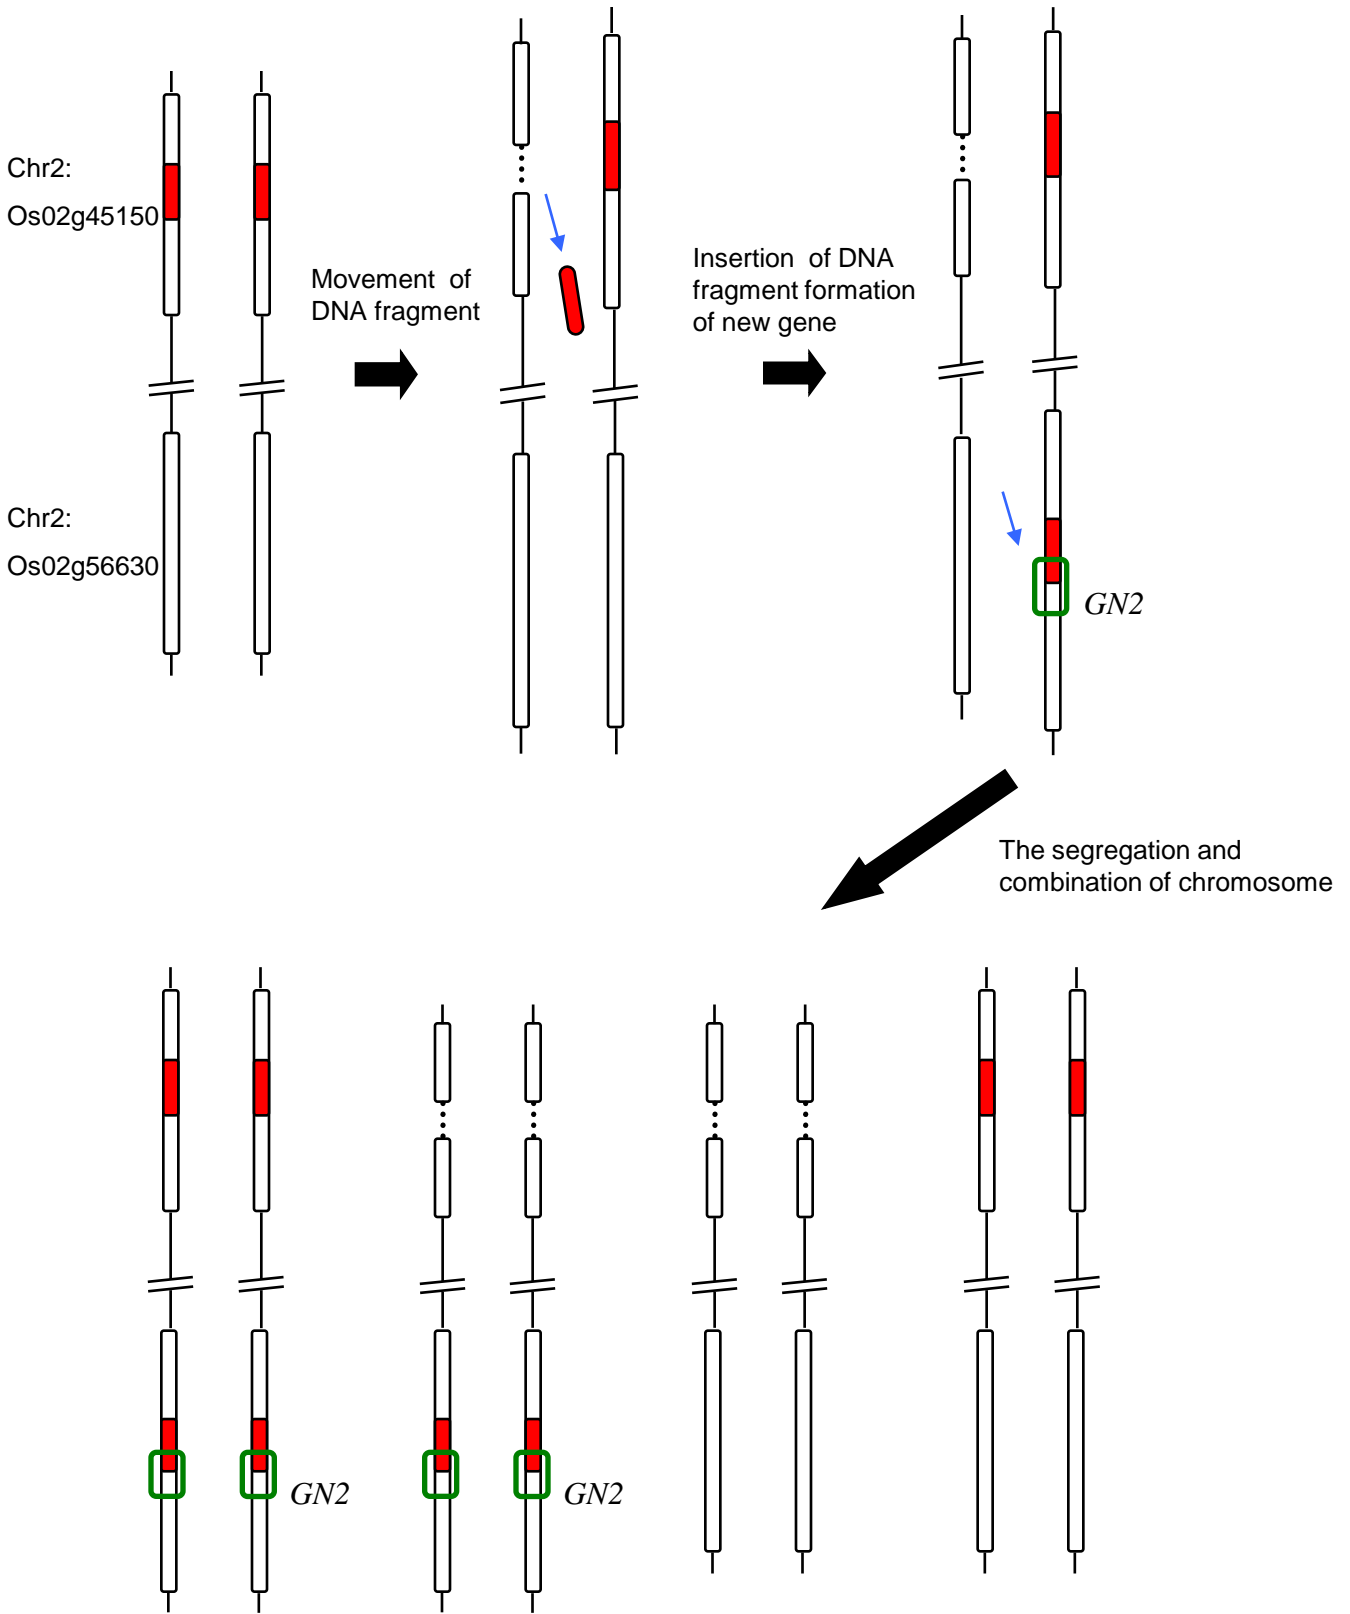

**Figure S9.** The origination and fixation processes of *GN2* from a genome view. The white box represents the chromosome, while the box in red represents the inserted DNA fragment. The dotted line represents the absence of the inserted DNA fragment in the previous genomic region. The green frame represents the position of the novel *GN2* gene's emergence.
