# Supplementary material
Source: PubMed Central journal article supplement (PMC5289865)
Supplement: 993TableS1.pdf [file 993TableS1.pdf]

Table S1: Comparison in some important agronomic traits between ‘YIL19’ and ‘Teqing’

| Traits                 | Teqing | YIL19 | Significance |
|------------------------|--------|-------|--------------|
| Panicle per plant      | 9.14   | 19.53 | * *          |
| Yield per plant (g)    | 21.15  | 15.09 | * *          |
| Flag leaf length (cm)  | 22.73  | 15.67 | * *          |
| 1,000 grain weight (g) | 23.12  | 22.85 | ×            |
| Spikelet fertility (%) | 67.08  | 68.20 | ×            |

Twenty plants of ‘Teqing’ and ‘YIL19’ were individually harvested and evaluated for the above seven traits. The plant height was measured from the ground to the top of the main panicle; days to heading was recorded as the period from the day of sowing to the appearance of the first panicle. For each trait, 10 plants each of ‘Teqing’ and ‘YIL19’ were measured. “\*\*\*” represents a significant difference at  $P < 0.01$ , while “×” represents no significant difference between the two groups.
