# Supplementary material
Source: PubMed Central journal article supplement (PMC5289865)
Supplement: 993TableS2.pdf [file 993TableS2.pdf]

Table S2: QTL analysis for grain number in the F<sub>2</sub> population derived from the cross between YIL19 and Teqing

| Population                      | Interval          | LRS  | LOD <sup>a</sup> | % <sup>b</sup> | Add <sup>c</sup> | Dom <sup>d</sup> |
|---------------------------------|-------------------|------|------------------|----------------|------------------|------------------|
| YIL19/<br>Teqing F <sub>2</sub> | RM5300-<br>RM6312 | 56.3 | 12.24            | 26             | 23.99            | -14.83           |

<sup>a</sup> Likelihood ratio statistic (LRS) value was divided by 4.6 to obtain the equivalent logarithm of the odds (LOD) score (Manly et al. 2001)

<sup>b</sup> Phenotypic variance explained by the QTL

<sup>c</sup> Additive effect associated with *O. rufipogon*

<sup>d</sup> Dominance effect associated with *O. rufipogon*
