# Supplementary material
Source: PubMed Central journal article supplement (PMC5289865)
Supplement: 993TableS3.pdf [file 993TableS3.pdf]

Table S3: Candidate genes for *GN2* in the fine mapping region according to the annotation system of Nipponbare

| Gene ID        | Start | Stop  | Annotation                                      |
|----------------|-------|-------|-------------------------------------------------|
| LOC_Os02g56630 | 2214  | 4707  | OsWAK receptor-like protein kinase              |
| LOC_Os02g56640 | 7952  | 11394 | retrotransposon protein, putative, unclassified |
| LOC_Os02g56650 | 12092 | 13870 | retrotransposon protein, putative, unclassified |
| LOC_Os02g56660 | 14491 | 17909 | retrotransposon protein, putative, unclassified |
| LOC_Os02g56670 | 22161 | 22482 | hypothetical protein                            |
| LOC_Os02g56680 | 23842 | 25630 | dehydrogenase, putative                         |
